# Supplementary material for: The structure and configuration changes of multifunctional peptide vectors enhance gene delivery efficiency
Source: Royal Society of Chemistry journal article supplement (doi:10.1039/c8ra04101f), 2018-01-01

## Supporting Information

# **The structure and configuration changes of multifunctional peptide vectors enhance gene delivery efficiency**

Sen Yang<sup>†</sup>, Zhao Meng<sup>†</sup>, Ziyao Kang, Chao Sun, Taoran Wang, Siliang Feng, Qingbin Meng\* and Keliang Liu\*

State Key Laboratory of Toxicology and Medical Countermeasures, Beijing Institute of Pharmacology and Toxicology, Beijing, 100850, China.

<sup>†</sup>These authors contributed equally to this work.

Email: [nankaimqb@sina.com](mailto:nankaimqb@sina.com), [keliangliu55@126.com](mailto:keliangliu55@126.com); Fax: +86-10-68211656; Tel: +86-10-68169363

**Table S1** Percentage of  $\alpha$ -helical conformation for peptide vectors

| Compounds | Percentage of $\alpha$ -helical conformation (%) |
|-----------|--------------------------------------------------|
| P-01      | 32.18                                            |
| P-02      | 34.67                                            |
| P-03      | 32.38                                            |
| P-04      | 34.60                                            |
| P-05      | 24.72                                            |
| P-06      | 27.99                                            |

**Figure S1** RP-HPLC of peptide vectors

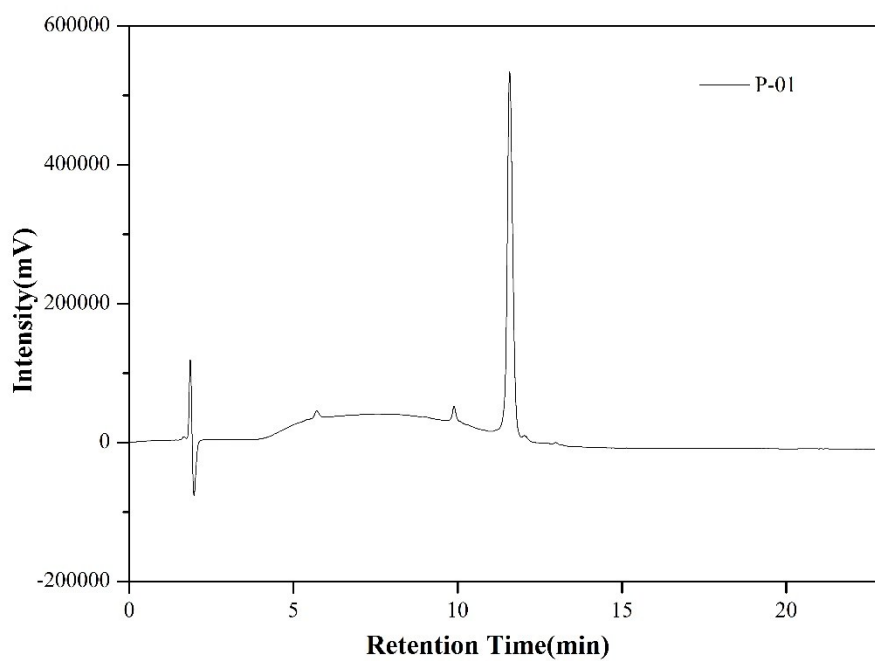

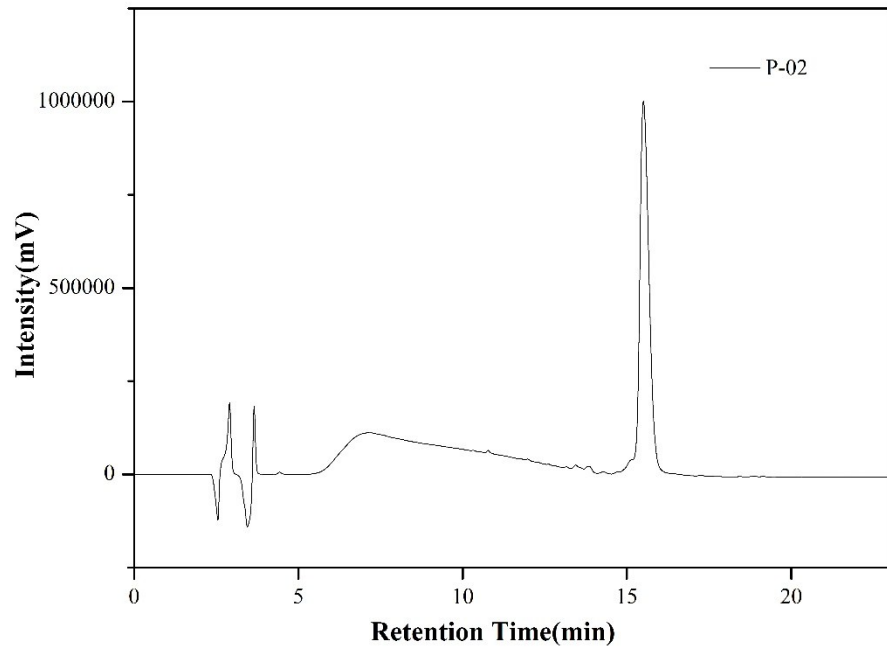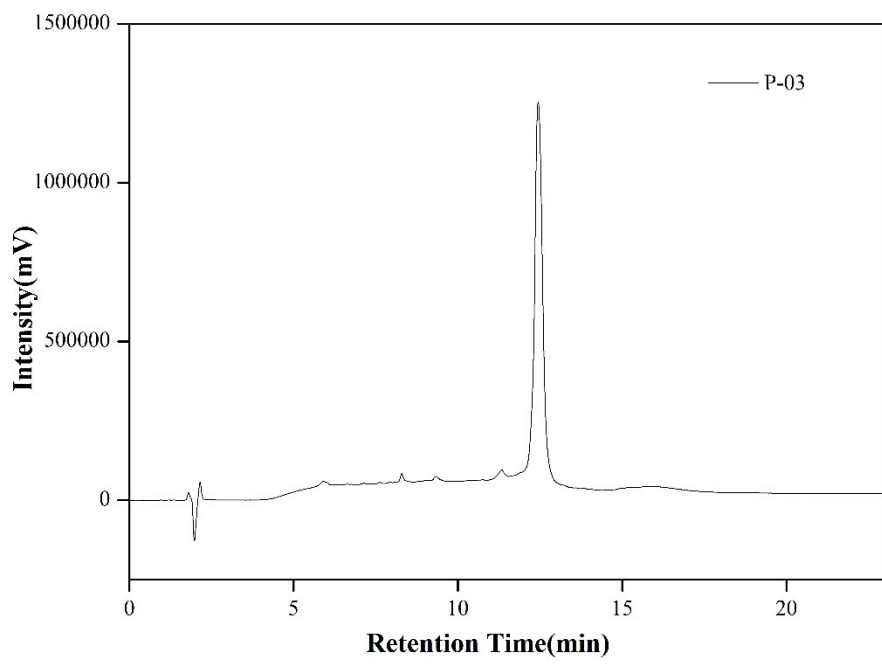

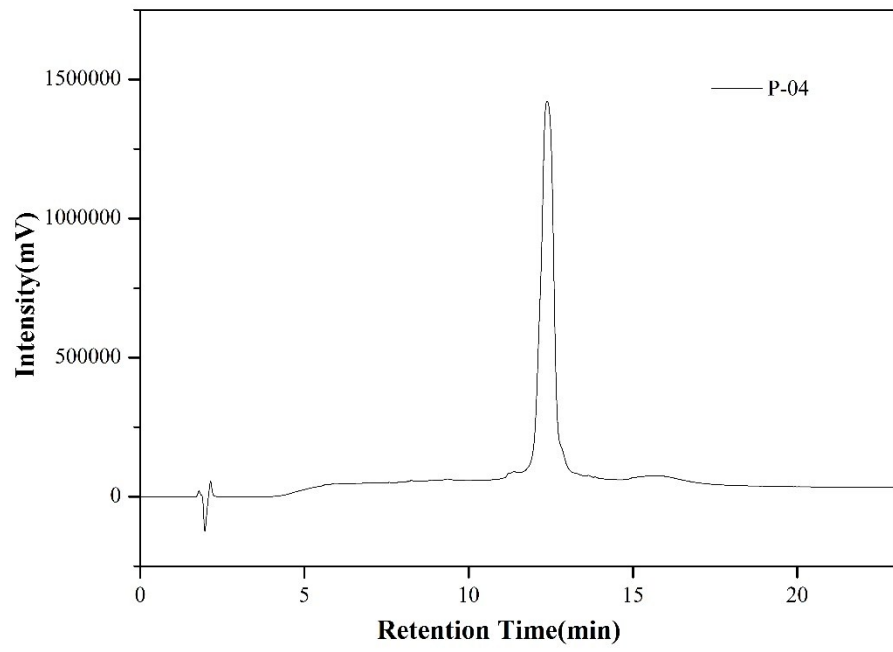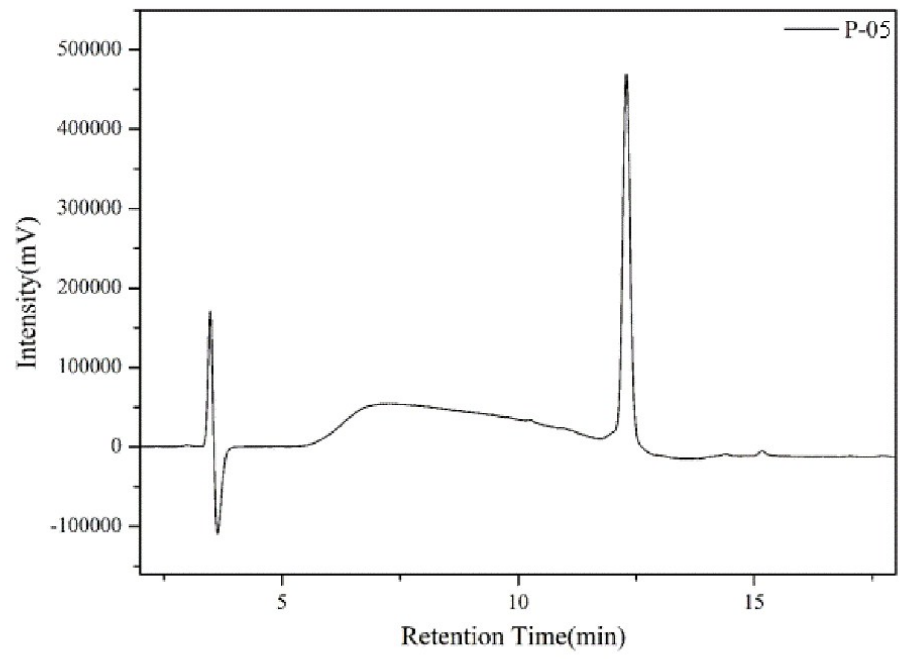

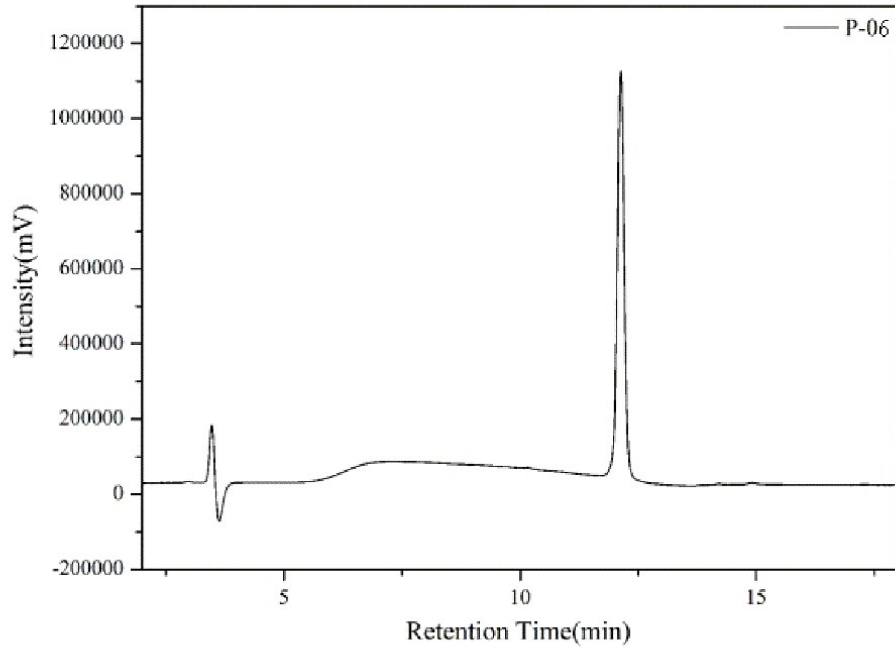

**Figure S2** ESI-MS and MALDI-TOF of peptide vectors

P-01

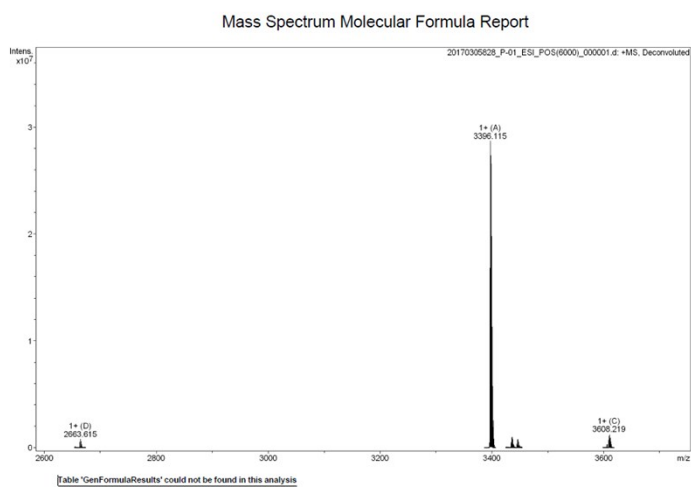

P-02

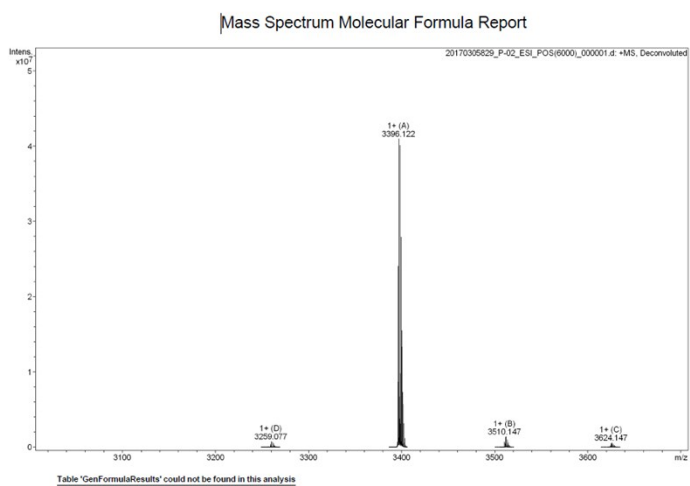

P-03

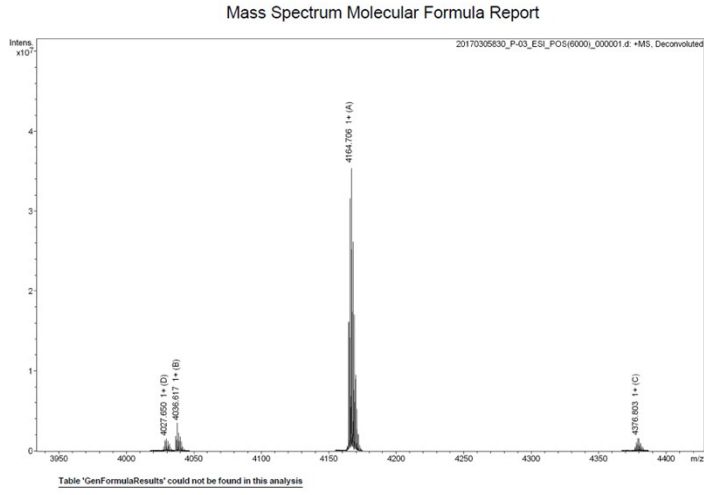

P-04

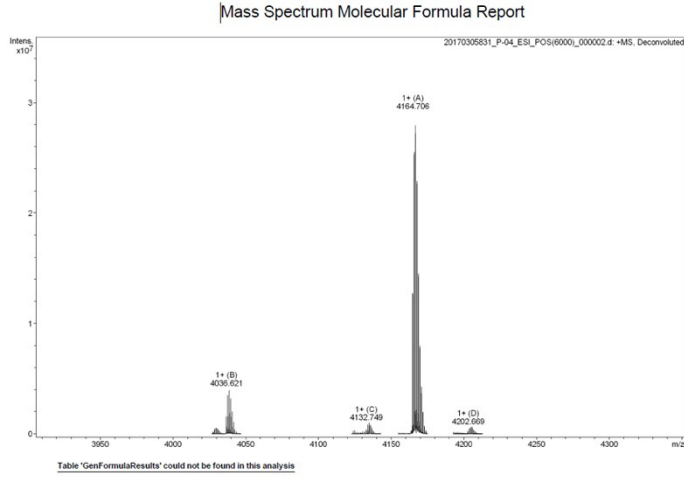

P-05

077

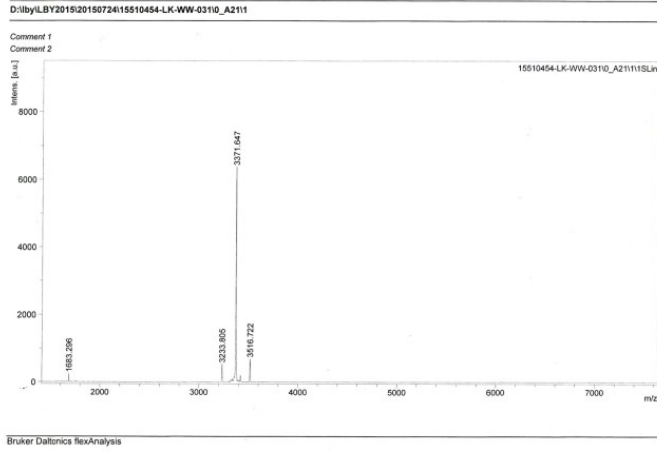

P-06

Mass Spectrum Molecular Formula Report

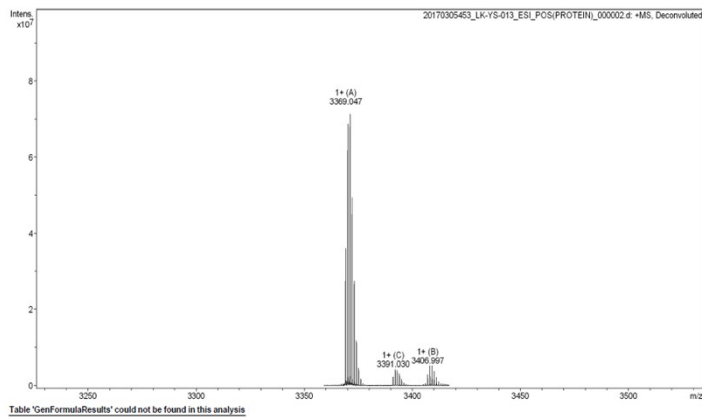

Supplement: c8ra04101f1.pdf [file c8ra04101f1.pdf]
